# Supplementary material for: RODAN: a fully convolutional architecture for basecalling nanopore RNA sequencing data
Source: PubMed Central journal article supplement (PMC9020074; doi:10.1186/s12859-022-04686-y), 2022-04-20
Supplement: 12859_2022_4686_MOESM1_ESM.pdf [file 12859_2022_4686_MOESM1_ESM.pdf]

# Supplementary material for: RODAN: a fully convolutional architecture for basecalling nanopore RNA sequencing data

Don Neumann, Anireddy S.N. Reddy, Asa Ben-Hur

February 28, 2022

## Alignment generation

minimap2 was run with options `--secondary=no -ax map-ont --cs`. The CS tag was used to determine the mismatches, insertions, and deletions to calculate the final accuracies. The accuracy.py script is available in the project's github repository.

## Details of the RODAN architecture

| Block | Operator          | Kernel / Stride | #Channels |
|-------|-------------------|-----------------|-----------|
| 1     | Convolution, SQEX | 3               | 256       |
| 2     | ConvBlock         | 10              | 256       |
| 3     | ConvBlock         | 10 / 10         | 256       |
| 4     | ConvBlock         | 10              | 320       |
| 5     | ConvBlock         | 15              | 384       |
| 6     | ConvBlock         | 20              | 448       |
| 7     | ConvBlock         | 25              | 512       |
| 8     | ConvBlock         | 30              | 512       |
| 9     | ConvBlock         | 35              | 512       |
| 10    | ConvBlock         | 40              | 512       |
| 11    | ConvBlock         | 45              | 512       |
| 12    | ConvBlock         | 50              | 512       |
| 13    | ConvBlock         | 55              | 768       |
| 14    | ConvBlock         | 60              | 768       |
| 15    | ConvBlock         | 65              | 768       |
| 16    | ConvBlock         | 70              | 768       |
| 17    | ConvBlock         | 75              | 768       |
| 18    | ConvBlock         | 80              | 768       |
| 19    | ConvBlock         | 85              | 768       |
| 20    | ConvBlock         | 90              | 768       |
| 21    | ConvBlock         | 95              | 768       |
| 22    | ConvBlock         | 100             | 768       |

Supplementary Table 1: The RODAN network architecture. Kernel denotes the convolution kernel size and stride denotes the kernel step which defaults to 1 unless noted. #Channels denotes the number of kernels utilized. The first block is a normal convolution followed by batchnorm, activation, and a squeeze and excitation layer.

| Dataset     | Basecaller     | Median       | Average      | Unaligned reads | Mis % | Del % | Ins % |
|-------------|----------------|--------------|--------------|-----------------|-------|-------|-------|
| Arabidopsis | Guppy          | 91.59        | 90.72        | N/A             | 2.32  | 4.77  | 2.18  |
|             | Taiyaki        | 91.10        | 90.37        | 957             | 2.28  | 5.34  | 2.01  |
|             | RODAN          | <b>92.89</b> | <b>92.24</b> | 1001            | 1.90  | 3.75  | 2.12  |
|             | RODAN (nobeam) | 92.51        | 91.99        | 1055            | 1.79  | 4.76  | 1.46  |
| Mouse       | Guppy          | 87.65        | 87.17        | N/A             | 3.88  | 6.29  | 2.66  |
|             | Taiyaki        | 86.25        | 85.97        | 3079            | 4.24  | 7.33  | 2.46  |
|             | RODAN          | <b>87.99</b> | <b>87.60</b> | 2819            | 3.78  | 6.43  | 2.19  |
|             | RODAN (nobeam) | 87.54        | 87.17        | 3291            | 3.61  | 7.47  | 1.76  |
| Human       | Guppy          | 90.60        | 89.87        | N/A             | 2.56  | 5.35  | 2.22  |
|             | Taiyaki        | 91.16        | 90.61        | 900             | 2.19  | 5.27  | 1.94  |
|             | RODAN          | <b>93.23</b> | <b>92.62</b> | 1307            | 1.73  | 3.52  | 2.13  |
|             | RODAN (nobeam) | 92.92        | 92.45        | 1086            | 1.62  | 4.59  | 1.34  |
| Yeast       | Guppy          | 91.35        | <b>90.51</b> | N/A             | 2.78  | 4.20  | 2.51  |
|             | Taiyaki        | 90.01        | 89.29        | 2721            | 3.21  | 4.71  | 2.79  |
|             | RODAN          | <b>91.41</b> | 90.46        | 3035            | 2.91  | 4.13  | 2.51  |
|             | RODAN (nobeam) | 91.11        | 90.22        | 3182            | 2.77  | 5.21  | 1.80  |
| Poplar      | Guppy          | 90.16        | 89.26        | N/A             | 2.95  | 4.92  | 2.87  |
|             | Taiyaki        | 89.72        | 88.90        | 1598            | 3.01  | 5.15  | 2.94  |
|             | RODAN          | <b>91.11</b> | <b>90.13</b> | 1652            | 2.77  | 4.26  | 2.84  |
|             | RODAN (nobeam) | 90.75        | 89.81        | 1813            | 2.64  | 5.50  | 2.05  |

Supplementary Table 2: Detailed basecalling accuracy across datasets for Guppy 4.4.0, Taiyaki 5.0, and RODAN 1.0. Only reads alignable by Guppy were used to build each dataset, hence the N/A for unaligned reads. RODAN (nobeam) refers to a beam search of 1 which is equivalent to greedy decoding. Mismatch, deletion and insertion percentages were computed with respect to the total length of the aligned portions of all reads.

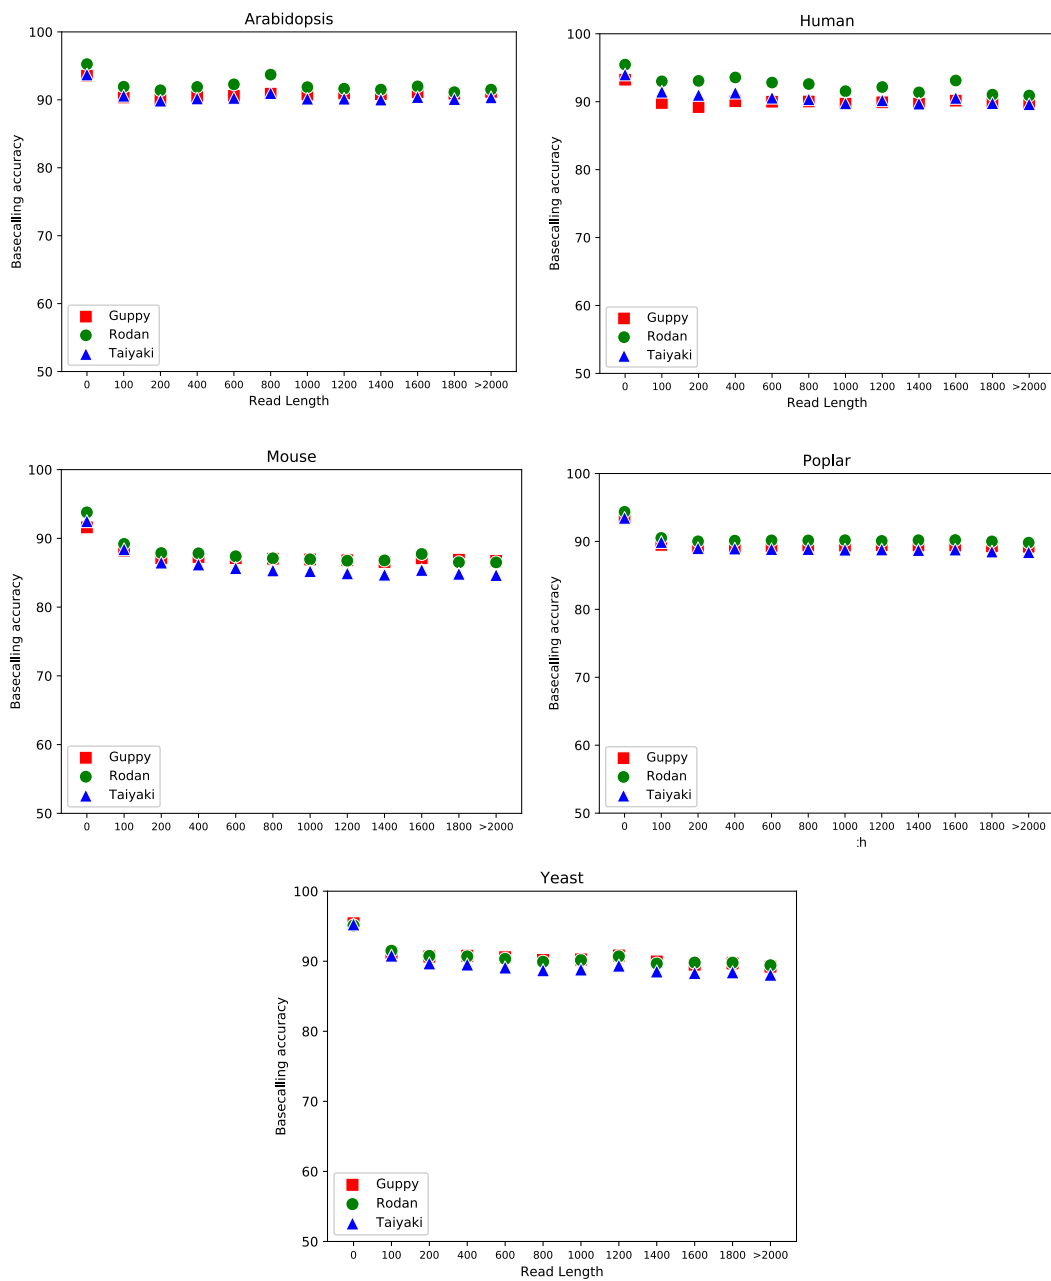

Supplementary Figure 1: Accuracy of RODAN, Guppy and Taiyaki as a function of read length across datasets.
